1 **Converging Evidence from Electrocorticography and BOLD fMRI for a Sharp**  
2 **Functional Boundary in Superior Temporal Gyrus Related to Multisensory Speech**  
3 **Processing**

4

5 Muge Ozker and Michael S. Beauchamp

6 michael.beauchamp@bcm.edu

7 Department of Neurosurgery and Core for Advanced MRI, Baylor College of Medicine,

8 Houston, TX, 77030

9

10

11

## 1 **Abstract**

2           Although humans can understand speech using the auditory modality alone, in noisy  
3 environments visual speech information from the talker's mouth can rescue otherwise  
4 unintelligible auditory speech. To investigate the neural substrates of multisensory speech  
5 perception, we recorded neural activity from the human superior temporal gyrus using two  
6 very different techniques: either directly, using surface electrodes implanted in five  
7 participants with epilepsy (electrocorticography, ECOG), or indirectly, using blood oxygen  
8 level dependent functional magnetic resonance imaging (BOLD fMRI) in six healthy  
9 control fMRI participants. Both ECOG and fMRI participants viewed the same clear and  
10 noisy audiovisual speech stimuli and performed the same speech recognition task. Both  
11 techniques demonstrated a sharp functional boundary in the STG, which corresponded to an  
12 anatomical boundary defined by the posterior edge of Heschl's gyrus. On the anterior side  
13 of the boundary, cortex responded more strongly to clear audiovisual speech than to noisy  
14 audiovisual speech, suggesting that anterior STG is primarily involved in processing  
15 unisensory auditory speech. On the posterior side of the boundary, cortex preferred noisy  
16 audiovisual speech or showed no preference and showed robust responses to auditory-only  
17 and visual-only speech, suggesting that posterior STG is specialized for processing  
18 multisensory audiovisual speech. For both ECOG and fMRI, the transition between the  
19 functionally distinct regions happened within 10 mm of anterior-to-posterior distance along  
20 the STG. We relate this boundary to the multisensory neural code underlying speech  
21 perception and propose that it represents an important functional division within the human  
22 speech perception network.

23

24

## 1 **Introduction**

2           The human ability to understand speech is one of our most important cognitive  
3 abilities. While speech can be understood using the auditory modality alone, vision  
4 provides important additional cues about speech. In particular, the mouth movements made  
5 by the talker can compensate for degraded or noisy auditory speech (Bernstein et al 2004,  
6 Ross et al 2007, Sumbly & Pollack 1954). While it has been known since Wernicke that  
7 posterior lateral temporal cortex is important for language comprehension, the advent of  
8 blood-oxygen level dependent functional magnetic resonance imaging (BOLD fMRI) led to  
9 important advances, such as the discovery that multiple regions in temporal cortex are  
10 selective for human voices (Belin et al 2000). However, BOLD fMRI suffers from a major  
11 limitation, in that it is a slow and indirect measure of neural function. Spoken speech  
12 contains 5 or more syllables per second, requiring the neural processes that decode each  
13 syllable to be completed in less than two hundred milliseconds. In contrast, the sluggish  
14 hemodynamic response that underlies BOLD fMRI does not peak until several seconds  
15 after the neural activity that prompted it.

16           This drawback underscores the importance of complementing fMRI with other  
17 techniques that directly measure neural activity. The non-invasive techniques of EEG and  
18 MEG have led to a better understanding of the temporal dynamics of speech perception  
19 (Crosse et al 2016, Salmelin 2007, Shahin et al 2012, Sohoglu & Davis 2016). Recently,  
20 there has also been tremendous interest in electrocorticography (ECOG), a technique in  
21 which electrodes are implanted in the brains of patients with medically intractable epilepsy.  
22 Compared with EEG and MEG, ECOG allows localization of activity to the small  
23 population of neurons nearest each electrode, leading to the discovery of selective  
24 responses in the superior temporal gyrus (STG) for various speech features, including

1 categorical representations of speech (Chang et al 2010) phonetic features (Mesgarani et al  
2 2014) and prosody (Tang et al 2017).

3           While the broad outlines of the organization of visual cortex are well-established  
4 (Grill-Spector & Malach 2004), the layout of auditory cortex is less well known. Early  
5 areas of auditory cortex centered on Heschl's gyrus contains maps of auditory frequency  
6 and spectral temporal modulation (Moerel et al 2014). In contrast, within auditory  
7 association cortex in the STG, organization by auditory features is weaker, and the location  
8 and number of different functional areas is a matter of controversy (Leaver & Rauschecker  
9 2016). Recently, we used ECOG to document a double dissociation between anterior and  
10 posterior regions of the STG (Ozker et al 2017). Both regions showed strong responses to  
11 audiovisual speech, but the anterior area strongly preferred speech in which the auditory  
12 component was clear while the posterior area preferred speech in which the auditory  
13 component was noisy or showed no preference. There was a sharp anatomical boundary,  
14 defined by the posterior edge of Heschl's gyrus, between the two areas. All electrodes  
15 anterior to the boundary preferred clear speech, and no electrodes posterior to the boundary  
16 did. These results were interpreted in the conceptual framework of multisensory  
17 integration. Auditory association areas in anterior STG respond strongly to clear auditory  
18 speech but show a reduced response because of the reduced information available in noisy  
19 auditory speech, paralleling the reduction in speech intelligibility. Multisensory areas in  
20 posterior STG area able use the visual speech information to compensate for the noisy  
21 auditory speech, restoring intelligibility. However, this demands recruitment of additional  
22 neuronal resources, leading to an increased response during noisy audiovisual speech  
23 perception.

1           While there have been numerous previous fMRI studies of noisy and clear  
2 audiovisual speech, *e.g.* (Bishop & Miller 2009, Callan et al 2003, Lee & Noppeney 2011,  
3 McGettigan et al 2012, Sekiyama et al 2003, Stevenson & James 2009) none described a  
4 sharp boundary in the response patterns to clear and noisy speech within the STG. BOLD  
5 fMRI has the spatial resolution necessary to detect fine-scale cortical boundaries, such as  
6 between neighboring ocular dominance columns (Cheng et al 2001), ruling out sensitivity  
7 of the technique itself as an explanation. Instead, we considered two other possibilities. One  
8 possible explanation is that the analysis or reporting strategies used in previous fMRI  
9 studies (such as group averaging or reporting only activation peaks) could have obscured a  
10 sharp functional boundary present in the fMRI data. A second, more worrisome,  
11 explanation is that the sharp boundary observed with ECOG reflects anomalous brain  
12 organization in the ECOG participants. Brain reorganization due to repeated seizures could  
13 have resulted in different STG functional properties in epileptic patients compared with  
14 healthy controls (Janszky et al 2003, Kramer & Cash 2012).

15           To distinguish these possibilities, we collected BOLD fMRI data from healthy  
16 controls viewing the same clear and noisy audiovisual speech stimuli viewed by the ECOG  
17 patients. Both fMRI and ECOG participants performed the same speech identification task.  
18 The BOLD fMRI data was analyzed without any spatial blurring or group averaging to  
19 ensure that these would not obscure areal boundaries within the STG. fMRI allows  
20 sampling of the entire brain volume, instead of the limited coverage obtained with ECOG  
21 electrodes. We used this ability to examine the preference for clear or noisy speech across  
22 the entire length of the STG.

23

24

## 1 **Methods**

2 All participants provided written informed consent and underwent experimental procedures  
3 approved by the Baylor College of Medicine (BCM) Institutional Review Board. ECOG  
4 data was collected from five participants with refractory epilepsy (3 women, mean age 31  
5 years) and fMRI data was collected from six participants recruited from the BCM  
6 community (3 women, mean age 25 years).

### 7 *Stimulus and Task*

8 For the main experiment, identical stimuli were used for the ECOG and fMRI participants.  
9 The stimuli consisted of audiovisual recordings of a female talker from the Hoosier  
10 Audiovisual Multi-Talker Database speaking single words ("rain" or "rock") in which the  
11 auditory component of was either unaltered (auditory-clear) or replaced with speech-  
12 specific noise that matched the spectrotemporal power distribution of the original auditory  
13 speech (auditory-noisy). A parallel manipulation was performed on the visual component  
14 of the speech by replacing the original video with a highly blurred version, resulting in four  
15 conditions (auditory-clear + visual-clear; auditory-clear + visual-blurred; auditory-noisy +  
16 visual-clear; auditory-noisy + visual-blurred). For the ECOG participants, from 32 to 56  
17 repetitions of each condition were presented in random order. For the fMRI participants, 60  
18 repetitions of each condition were presented in random order.

19 Following each stimulus presentation, participants performed a two-alternative  
20 forced choice on the identity of the presented word. Accuracy was at ceiling for the  
21 auditory-clear conditions (auditory-clear with visual-clear: 99% for fMRI participants, 99%  
22 for ECOG participants; with visual-noisy: 99% for fMRI, 98% for ECOG) and lower for  
23 auditory-noisy conditions (with visual-clear: 91% for fMRI, 81% for ECOG; with visual-  
24 noisy: 75% for fMRI, 63% for ECOG).

1 fMRI participants also passively viewed standard localizer stimuli consisting of  
2 auditory-only, visual-only and audiovisual version of short stories (Aesop's fables) (Nath &  
3 Beauchamp 2012, Nath et al 2011).

#### 4 *Definition of Anterior and Posterior Superior Temporal Gyrus (STG)*

5 Cortical surface models were constructed from the high-resolution T1-weighted  
6 anatomical MRI scans of ECOG and fMRI participants using FreeSurfer (Fischl et al 2001).  
7 For ECOG participants, the post-implantation computed tomography (CT) scan showing  
8 the electrode locations was registered to the anatomical MRI to ensure accurate electrode  
9 localization.

10 Two atlases were used to parcellate the STG. The Destrieux atlas defines the entire  
11 STG using the "G\_temp\_sup-Lateral" label (lateral aspect of the STG) (Destrieux et al  
12 2010). The Desikan-Killiany atlas (Desikan et al 2006) applies a single "Superior  
13 Temporal" label to both the STG and the STS with an additional "Banks Superior  
14 Temporal" label for the posterior portion of the STS, with an anterior border defined by the  
15 posterior-most point of Heschl's gyrus. We cleaved the Destrieux STG into an anterior  
16 portion and a posterior portion using the Heschl's gyrus landmark defined by the Desikan-  
17 Killiany atlas (boundary shown as black dashed lines in Figure 1). The posterior STG is  
18 continuous with the supramarginal gyrus. Since the two atlases vary in their handling of  
19 this boundary, we manually defined the posterior boundary of the STG as being just past  
20 the location where the gyrus begins its sharp turn upward into parietal lobe. All analyses  
21 were done only within single participants without any normalization or spatial blurring. In  
22 order to report the location of the anterior-posterior boundary in standard space, individual  
23 MRIs were aligned to the N27 brain (Holmes et al 1998).

#### 24 *ECOG Experimental Design and Data Analysis*

1 Experiments were conducted in the epilepsy monitoring unit of Baylor St. Luke's  
2 Medical Center. Patients rested comfortably in their hospital beds while viewing stimuli  
3 presented on an LCD monitor mounted on a table and positioned at 57 cm distance from the  
4 participant. While the participants viewed stimulus movies, a 128-channel Cerebus  
5 amplifier (Blackrock Microsystems, Salt Lake City, UT) recorded from subdural electrodes  
6 that consisted of platinum alloy discs (diameter 2.3 mm) embedded in a flexible silicon  
7 sheet with inter-electrode distance of 10 mm. An inactive intracranial electrode implanted  
8 facing the skull was used as a reference for recording. Signals were amplified, filtered, and  
9 digitized at 2 kHz. Offline, common average referencing was used to remove artifacts, and  
10 the data was epoched according to stimulus timing. Line noise was removed and spectral  
11 decomposition was performed using multitapers. The measure of neural activity was the  
12 broad-band high-gamma response (70 - 110 Hz) measured as the percent change relative to  
13 a pre-stimulus baseline window (500 to 100 ms before auditory stimulus onset). The high  
14 broadband response was used as it is the ECOG signal most closely associated with the rate  
15 of action potentials and the BOLD fMRI response (reviewed in Ojemann et al 2013, Ray &  
16 Maunsell 2011). Across patients, a total of 527 intracranial electrodes were recorded from.  
17 Of these, 55 were located on the STG. 27 of these showed a minimal level of stimulus-  
18 related activity, defined as significant high-gamma responses to audiovisual speech  
19 compared with prestimulus baseline ( $p < 10^{-3}$ , equivalent to ~40% increase in stimulus  
20 power from baseline) and were included in the analysis.

#### 21 *fMRI Experimental Design and Data Analysis*

22 Experiments were conducted in the Core for Advanced MRI (CAMRI) at Baylor  
23 College of Medicine using a 3 Tesla Siemens Trio MR scanner equipped with a 32-channel  
24 head gradient coil. BOLD fMRI data was collected using a multislice echo planar imaging



1 sequence (Setsompop et al. 2012) with TR = 1500 ms, TE = 30 ms, flip angle = 72°, in-  
2 plane resolution of 2 × 2 mm, 69 2-mm axial slices, multiband factor: 3, GRAPPA factor:  
3 2. fMRI data was analyzed using the afni\_proc.py pipeline (Cox 1996). Data was time  
4 shifted to account for different acquisition times for different slices; aligned to the first  
5 functional volume which was in turn aligned with the high-resolution anatomical; and  
6 rescaled so that each voxel had a mean of 100. No blurring or spatial normalization of any  
7 sort was applied to the EPI data.

8 Data for the main fMRI experiment was collected in five runs, each with 160 brain  
9 volumes (4 minutes duration). Each run contained forty-eight 3-second trials, twelve for  
10 each stimulus condition, for a total of sixty repetitions of each condition. A rapid event-  
11 related design was used with fixation baseline occupying the remaining 96 seconds of each  
12 run, optimized with the scheduling algorithm optseq2  
13 (<https://surfer.nmr.mgh.harvard.edu/optseq>) (Dale et al 1999).

14 Data for the localizer fMRI experiment was collected in two runs, each with 180  
15 brain volumes (4:30 duration); for one participant, only one run was collected. Each run  
16 contained nine blocks (20-seconds of stimulus, 10 seconds of fixation baseline) consisting  
17 of three blocks each (in random order) of auditory-only, visual-only, and audiovisual  
18 speech recorded by a female talker (Nath & Beauchamp 2012, Nath et al 2011).

19 A generalized linear model was used to model the fMRI time series independently  
20 for each voxel using the 3dDeconvolve function in AFNI. The model contained 10  
21 regressors: 6 regressors of no interest generated by the motion correction process and 4  
22 regressors of interest (one for each stimulus condition) using an exponential hemodynamic  
23 response function generated with the 3dDeconvolve option "BLOCK(2,1)". A general  
24 linear test with the values of "+1 +1 -1 -1" was used to find the *t*-statistic for the contrast

1 between the two conditions with clear auditory speech and the two conditions with noisy  
2 auditory speech (data in Figures 1 and 2). This contrast between auditory-clear and  
3 auditory-noisy was the main dependent measure in the analysis.

4 For the STG length analysis (Figure 2), unthresholded fMRI data in the form of the  
5 clear vs. noisy *t*-statistic was mapped to the cortical surface using the AFNI function  
6 3dVol2Surf. The options "-ave -f\_steps 15" were used, resulting in a line between each  
7 node on the pial surface and the corresponding node on the smoothed white matter surface  
8 being subdivided into 15 equal segments, with the fMRI voxel values at each segment  
9 sample and averaged. The entire STG was divided into 1 mm bins, from anterior to  
10 posterior, and the *t*-statistic at all nodes within each bin was averaged. For each  
11 hemisphere, a functional boundary was defined as the bin containing the first zero-crossing  
12 of the *t*-statistic (moving in an anterior-to-posterior direction) in the posterior third of the  
13 STG.

14 To estimate the shape of the hemodynamic response function without assumptions  
15 (data in Figures 3, 4, 5), a second model was constructed that used tent functions to  
16 estimate the amplitude of the response independently at each time point of the BOLD  
17 response. For the main fMRI experiment, the response window spanned 0 to 15 seconds  
18 after stimulus onset (11 time points at a TR of 1.5 seconds) using the 3dDeconvolve option  
19 "TENTzero(0,15,11)", resulting in a model with 50 regressors (6 motion regressors and 44  
20 regressors of interest). For the localizer fMRI experiment, the response window spanned 0  
21 to 30 seconds after stimulus onset (21 time points) using "TENTzero(0,30,21)" for each of  
22 the three block types. The beta-weights at the 4.5 second, 6 second, and 7.5 second time  
23 points were averaged to create an estimate of response amplitude.

1           To estimate the average BOLD fMRI hemodynamic response function, anterior and  
2 posterior STG ROIs were created in each participant using as a boundary either the  
3 anatomical Heschl's gyrus boundary or the functional boundary defined by the STG length  
4 analysis. The anterior STG ROI contained all voxels from 0 to 30 mm anterior to the  
5 boundary and the posterior STG ROI contained all voxels from 0 to 15 mm posterior to the  
6 boundary. These values were chosen for consistency with the ECOG electrode locations,  
7 which ranged from 30 mm anterior to the anatomical/functional boundary to 15 mm  
8 posterior to it (Figure 1B). For correspondence with the ECOG electrode selection criteria  
9 (in which only electrodes that showed some response were included in the analysis) only  
10 voxels with an omnibus Full-F statistic of  $F > 5$  ( $q < 10^{-6}$ ) were included in the ROIs.

11           To directly compare the BOLD fMRI with the ECOG responses, the ECOG  
12 response were convolved with a double-gamma hemodynamic response function with peak  
13 time = 6 seconds, undershoot time = 10 seconds and response-to-undershoot ratio = 4  
14 (Lindquist et al 2009). The only free parameter was a scale parameter that matched the  
15 amplitude of the predicted and actual fMRI responses; ascale parameters that minimized the  
16 difference between the predicted and actual fMRI responses for each of the four curves  
17 were found using the Matlab function *fminbnd* (Figure 4).

### 18 *Linear Mixed-effects Models*

19           Linear mixed-effect models were constructed using *R* with the lme4 package to  
20 understand the relationship between the different experimental variables. The dependent  
21 measure was the % signal change from baseline. The fixed factors were location (anterior  
22 vs. posterior STG), the presence or absence of auditory noise (auditory-clear vs. auditory-  
23 noisy) and the presence or absence of visual noise (visual-clear vs. visual-noisy). For each  
24 fixed factor, the LME estimated the significance of the effect and the magnitude of the

1 effect relative to a baseline condition, which was always the response to auditory-clear,  
2 visual-clear speech in anterior STG.

### 3 **Results**

4 Electrodes implanted on the posterior portion of the STG responded robustly to audiovisual  
5 speech. However, within the posterior STG we observed a striking dissociation between  
6 more anterior electrodes, which preferred audiovisual speech with a clear auditory  
7 component, and more posterior electrodes, which preferred speech with a noisy auditory  
8 component or showed no preference (Figure 1A). The posterior-most point of Heschl's  
9 gyrus has been proposed as a boundary dividing the STG/STS into anterior and posterior  
10 sections (Desikan et al 2006, Ozker et al 2017). As shown in Figure 1B, adapted from  
11 Figure 2G of (Ozker et al 2017), all electrodes anterior to the boundary preferred clear  
12 speech while none of the electrodes posterior to the boundary did. The difference in  
13 response patterns between anterior and posterior electrodes was very large, even between  
14 electrodes that were only 10 mm apart, the closest possible distance in our recording array.  
15 For instance, in one participant the response to clear speech of an anterior electrode was  
16 double its response to noisy speech ( $138\% \pm 13\%$  vs.  $49\% \pm 5\%$ , mean across trials  $\pm$  SEM;  
17 unpaired t-test:  $t_{109} = +6.2$ ,  $p = 10^{-8}$ ) while the adjacent electrode, located 10 mm posterior  
18 across the boundary, responded half as much to clear speech as noisy speech ( $38\% \pm 5\%$  vs.  
19  $89\% \pm 9\%$ ,  $t_{109} = -4.5$ ,  $p = 10^{-5}$ ).

20 To determine if a similar boundary could be observed with fMRI, we scanned  
21 participants viewing the same stimuli as the ECOG participants and mapped the  
22 unthresholded statistical contrast of clear vs. noisy speech to a cortical surface model of  
23 each hemisphere (Figure 1C). The most posterior portion of the STG preferred noisy speech  
24 or showed no preference while more anterior regions preferred clear speech.

1           To quantify the location of the boundary between anterior and posterior STG, the  
2 preference for clear *vs.* noisy audiovisual speech in unthresholded fMRI data was plotted in  
3 1 mm bins for the entire anterior-to-posterior extent of the STG (Figure 2). In the posterior  
4 STG of each hemisphere, there was a sign change in the *t*-statistic of the clear *vs.* noisy  
5 contrast (red lines in Figure 2). This sign change was used to define a *functional* A-P  
6 boundary in the STG. The posterior margin of Heschl's gyrus was used to define an  
7 *anatomical* A-P boundary in the STG (black lines in Figure 2).

8           The mean anterior-to-posterior location of the fMRI-defined functional boundary in  
9 standard space was  $y = -28$  mm ( $\pm 9$  mm SD). The mean standard space location of the  
10 atlas-defined anatomical boundary in these participants was  $y = -30$  mm ( $\pm 5$  mm SD).

11           In some cases, the boundaries aligned remarkably well (*e.g.* inter-boundary distance  
12 of 1 mm, case OD right hemisphere) while in others they were farther apart (*e.g.* distance of  
13 20 mm, case OE right hemisphere). There was no consistent anterior-to-posterior difference  
14 between the anatomical and functional boundaries, resulting in a small mean distance  
15 between them ( $y = -28$  *vs.*  $-30$ ,  $t_{11} = 0.2$ ,  $p = 0.8$ ).

16           The location of the anatomical and functional boundaries in the fMRI participants  
17 were similar to that of the anatomical boundary in the ECOG participants, located at  $y = -$   
18  $27$  mm ( $\pm 2$  mm SD); the 1 cm spacing of the ECOG electrodes did not allow a separate  
19 estimate of the functional boundary.

20           As in the ECOG data, the fMRI transition between clear and noisy speech preferring  
21 cortex happened over a short cortical distance. For instance, in participant OD's left  
22 hemisphere, the *t*-statistic of the clear *vs.* noisy contrast changed from  $t = +5$  to  $t = -2$   
23 within 10 mm.

1           Next, we examined the fMRI response profiles on either side of the anatomical and  
2 functional boundaries (Figure 3). We classified the STG from 0 to 30 mm anterior to each  
3 boundary as "anterior" and the STG from 0 to 15 mm posterior to each boundary as  
4 "posterior". These values were chosen for consistency with the ECOG electrode locations,  
5 which ranged from 30 mm anterior to the boundary to 15 mm posterior to it.

6           Both the anatomical and functionally-defined STG ROIs showed the characteristic  
7 BOLD response, with a positive peak between 4 and 6 seconds and a negative post-  
8 undershoot at the 10.5 second time point. The responses were robust, with a peak between  
9 0.2% and 0.4% for a single audiovisual word. The anterior STG preferred clear to noisy  
10 speech, while the posterior STG showed no preference or preferred noisy speech. To  
11 quantify these differences, linear mixed effects (LME) models were constructed.

12           Table 1 shows the results of the LME on the fMRI response amplitudes using an  
13 anatomically-defined border between anterior and posterior STG. There were three  
14 significant effects in the model. There was a small but significant effect of ROI location  
15 driven by a smaller overall response in the posterior STG ( $p = 0.01$ , effect magnitude of  
16 0.07%). There were two larger effects: a main effect of auditory noise driven by a weaker  
17 overall response to noisy auditory stimuli ( $p = 10^{-6}$ , magnitude 0.14%) and an interaction  
18 between auditory noise and ROI driven by a larger response to noisy auditory stimuli in  
19 posterior STG ( $p = 10^{-4}$ , magnitude 0.16%).

20           Table 2 shows the results of an LME using a functionally-defined border between  
21 anterior and posterior STG. As with the LME on the anatomically-defined border, the  
22 largest effects were an interaction between auditory noise and location ( $p = 10^{-4}$ , magnitude  
23 0.21%) and a main effect of auditory noise ( $p = 10^{-4}$ , magnitude -0.14%). These results are  
24 consistent with the LME on the anatomical border. One note of caution is that the LME

1 using the functionally-defined border incorporated fMRI data, potentially biasing the  
2 model.

3 For comparison, Table 3 shows the results of a linear mixed-effects model on the  
4 ECOG responses, reprinted from Table 1 of (Ozker et al 2017). As with the LMEs on the  
5 fMRI data, the largest effects were a main effect of auditory noise ( $p = 10^{-13}$ , magnitude -  
6 110%) and an interaction between auditory noise and location ( $p = 10^{-10}$ , magnitude  
7 +141%).

8 Direct comparison of the fMRI and ECOG responses required additional analyses.  
9 The first obstacle was the different time scale of the responses. Figure 4 shows the ECOG  
10 responses from the STG, reprinted from Figure 4 of (Ozker et al 2017). Increases in the  
11 high broadband signal began less than 100 ms after the onset of auditory speech, and  
12 peaked at about 200 ms after auditory speech onset. To convert the directly-recorded neural  
13 activity measured with ECOG to the indirect and much slower measure of neural activity  
14 provided by BOLD fMRI, the ECOG responses were convolved with a standard  
15 hemodynamic response function (Figure 4C) and downsampled from 1 ms resolution to a  
16 temporal resolution of 1.5 seconds, the repetition time (TR) of the fMRI data. This created  
17 a predicted fMRI response (based on the measured ECOG responses) on the same time  
18 scale and time base as the actual fMRI response. The second obstacle was the different  
19 amplitude scales of the responses. ECOG amplitude is measured in % change in the high-  
20 gamma broadband signal relative to pre-stimulus fixation baseline, while fMRI signal  
21 amplitude is measured in % intensity increase of the EPI images relative to fixation  
22 baseline. A separate scale factor was calculated for each condition in order to generate the  
23 best fit between the predicted and actual fMRI responses.

1           Figure 4D shows the predicted-from-ECOG responses and actual fMRI responses  
2 (based on the functional boundary between anterior and posterior STG). The shape of the  
3 responses was similar, as demonstrated by a high correlation coefficient between predicted  
4 and actual responses (anterior STG: 0.98 for auditory-clear, 0.96 for auditory-noisy;  
5 posterior STG: 0.97 for auditory-clear, 0.99 for auditory-noisy). The average across scale  
6 factor across conditions for the amplitude conversion was 612 ECOG% per BOLD%,  
7 meaning that a peak ECOG response of 612% was equivalent to a BOLD fMRI response of  
8 1%. The scale factors were identical for auditory-clear and auditory-noisy conditions in  
9 posterior STG (476) but were markedly higher in anterior STG, especially for auditory-  
10 clear audiovisual words (909 for auditory-clear and 588 for auditory-noisy). This reflected  
11 the fact that in the ECOG data, the anterior STG response to clear speech was more than  
12 twice as large as the response to auditory-noisy speech (300% vs. 110%) while in fMRI, the  
13 anterior STG preferred clear speech to noisy speech but the difference was less pronounced  
14 (0.37% vs. 0.24%).

15           In ECOG and fMRI, we observed distinct patterns of responses to clear and noisy  
16 speech in anterior and posterior STG. A possible explanation for these results is that  
17 anterior STG is unisensory auditory cortex, rendering it susceptible to auditory noise added  
18 to speech, while posterior STG is multisensory auditory-visual cortex, allowing it to  
19 compensate for auditory noise using visual speech information. This explanation predicts  
20 that posterior STG should show stronger responses to visual speech than anterior STG. To  
21 test this explanation, we took advantage of the fact that the fMRI participants viewed  
22 standard block-design localizers containing sentences of unisensory visual, unisensory  
23 auditory and audiovisual speech. We measured the response to these localizers in STG  
24 ROIs defined using the functional boundary (Figure 5). This analysis was unbiased because



1 the functional boundary was created using the auditory-clear and auditory-noisy data,  
2 completely independent of the localizers.

3 As predicted, the response to the unisensory visual speech presented in the localizer  
4 was significantly stronger in posterior STG than in anterior STG (posterior *vs.* anterior:  
5 0.4% *vs.* 0.1%,  $p = 0.02$  for visual speech). This could not be explained by an overall  
6 difference in responsiveness; in fact, for the other localizer stimuli, there was a trend  
7 towards weaker responses in posterior STG (posterior *vs.* anterior: 0.7% *vs.* 1.1%,  $p = 0.09$   
8 for unisensory auditory speech; 1.3% *vs.* 1.7%;  $p = 0.07$  for audiovisual speech), consistent  
9 with the weaker responses in posterior STG to single audiovisual words observed in the  
10 main experiment (effect of posterior location in Table 1).

## 11 **Discussion**

12 We measured neural activity in the human STG using two very different techniques:  
13 directly, using surface electrodes implanted in ECOG participants with epilepsy, or  
14 indirectly, using the BOLD response in fMRI participants were healthy controls. Both  
15 ECOG and fMRI participants viewed the same clear and noisy audiovisual speech stimuli  
16 and performed the same speech recognition task. Both techniques demonstrated a sharp  
17 functional boundary in the STG. On the anterior side of the boundary, cortex strongly  
18 preferred clear audiovisual speech to noisy audiovisual speech. On the posterior side of the  
19 boundary, cortex preferred noisy audiovisual speech or showed no preference. For both  
20 techniques, the boundary was located at a similar location in standard space ( $y = -30$  mm)  
21 and the transition between the two functional zones happened within 10 mm of anterior-to-  
22 posterior distance along the STG.

23 In both fMRI and ECOG patients, an anatomical boundary set at the most posterior  
24 point of Heschl's gyrus provided a reasonable proxy for the functional boundary. This is

1 important because unlike the fMRI or ECOG data needed to locate the functional boundary,  
2 the structural MRI scan needed to locate the anatomical boundary is easily obtainable (for  
3 instance, in the examination of patients with brain lesions). While primary visual and  
4 auditory cortex are easily localizable using anatomical landmarks, it has proven to be much  
5 more of a challenge to find landmarks for association areas (Weiner & Grill-Spector 2011,  
6 Witthoft et al 2014).

7         Multisensory integration provides a conceptual framework for understanding these  
8 results. When noisy auditory speech is presented, auditory information alone is insufficient  
9 for perception, and auditory-speech regions in anterior STG respond with diminished  
10 intensity. Visual speech information can compensate for noisy auditory speech (Bernstein  
11 et al 2004, Ross et al 2007, Sumbly & Pollack 1954), but this requires recruitment of  
12 multisensory brain regions capable of combining the auditory and visual speech  
13 information to restore intelligibility. While both anterior and posterior STG responded to  
14 audiovisual speech, data from the fMRI localizer experiment showed that posterior STG  
15 responded more strongly to visual-only speech than anterior STG, supporting the idea that  
16 posterior STG is a multisensory area capable of combining auditory and visual speech.

17         The neural code in posterior STG is hinted at by a recent study that found that a  
18 region of posterior STG and STS (similar to the posterior STG region described in the  
19 present manuscript) preferred silent videos of faces making mouth movements to silent  
20 videos of faces making eye movements (Zhu & Beauchamp 2017). The same region  
21 responded strongly to unisensory auditory speech and preferred vocal to non-vocal sounds.  
22 Interestingly, as statistical thresholds were increased to select voxels with a greater  
23 preference for visual mouth movements, response to unisensory auditory speech increased,  
24 suggesting that at a single voxel level, small populations of neurons code for mouth

1 movements and speech sounds, the two components of audiovisual speech (Bernstein et al  
2 2011). This cross-modal correspondence in neural coding of multisensory cues is exactly as  
3 predicted by computational models of multisensory integration (Beck et al 2008, Magnotti  
4 & Beauchamp 2017).

5         There is a substantial body of evidence showing that posterior STS is a cortical hub  
6 for multisensory integration, multisensory, responding to both auditory and visual stimuli  
7 including faces and voices, letters and voices, and recordings and videos of objects  
8 (Beauchamp et al 2004, Calvert et al 2000, Foxe et al 2002, Miller & D'Esposito 2005,  
9 Reale et al 2007, van Atteveldt et al 2004). The finding that the adjacent cortex in posterior  
10 STG is also important for multisensory integration has several ramifications. In a  
11 transcranial magnetic stimulation (TMS) study, integration of auditory and visual speech  
12 (as indexed by the McGurk effect) was disrupted with TMS targeted at the posterior STS  
13 (Beauchamp et al 2010). The present results suggest that posterior STG may also have  
14 played a role in the observed disruption, and raise the possibility that electrical brain  
15 stimulation of STG in ECOG patients can increase our understanding of multisensory  
16 speech perception as it has for visual perception (Murphey et al 2008, Rangarajan & Parvizi  
17 2015).

18         While there have been numerous previous fMRI studies of noisy and clear  
19 audiovisual speech, *e.g.* (Bishop & Miller 2009, Callan et al 2003, Lee & Noppeney 2011,  
20 McGettigan et al 2012, Sekiyama et al 2003, Stevenson & James 2009) none described a  
21 sharp boundary in the response patterns to clear and noisy speech within the STG. A likely  
22 explanation is that many of the previous studies use spatial filtering or blurring as a  
23 preprocessing step in their fMRI data analysis pipeline and reported only group average  
24 data, which introduces additional blurring due to inter-subject anatomical differences,

1 especially for commonly-used volume-based templates. Combined, these two spatial  
2 blurring steps could easily eliminate sharp boundaries present in fMRI data. For instance,  
3 blurring eliminates the otherwise robust observation of functional specialization for  
4 different object categories in visual cortex (Tyler et al 2003). Another possible explanation  
5 for the failure of previous studies to observe the boundary is the common practice of  
6 reporting responses only at the location of activation peaks, rather than examining the entire  
7 extent of the activation. Anterior and posterior STG form a continuous region of active  
8 cortex, with the strongest activation in anterior STG. Therefore, only reporting responses  
9 from a single peak STG location (which would almost certainly fall in anterior STG) would  
10 camouflage the very different pattern of activity in posterior STG.

#### 11 *Implications for ECOG and fMRI*

12 While the primary goal of our study was not a comparison of the two methodologies, there  
13 was good correspondence between the actual fMRI signal and the fMRI signal predicted  
14 from our measure of ECOG amplitude, the broadband high-gamma response in the window  
15 from 70 - 110 Hz. This is consistent with mounting evidence that the high-frequency  
16 broadband signal in ECOG is a good match for the fMRI signal (reviewed in Ojemann et al  
17 2013). Other ECOG measures, such as the narrowband gamma response (30 - 80 Hz) or the  
18 narrowband alpha response, may characterize neuronal synchrony rather than level of  
19 neuronal activity, and hence are poorly correlated with the BOLD signal (Hermes et al  
20 2017).

21 A reassuring finding from the present study is that we observed similar patterns of  
22 responses between ECOG patients with epilepsy and healthy controls viewing the same  
23 stimuli and performing the same task. This provides data to partially mitigate persistent  
24 concerns that ECOG patients may have different brain organization than healthy controls,

1 reducing the generalizability of the results of ECOG studies. One minor discrepancy  
2 between the ECOG and fMRI results was a larger relative amplitude for preferred stimuli in  
3 ECOG. For instance, anterior STG showed a nearly three-fold difference in the response  
4 amplitude to clear *vs.* noisy audiovisual speech (300% *vs.* 110%). The difference in fMRI  
5 was the same direction but much smaller (0.37% *vs.* 0.24%). We attribute this to the ability  
6 of ECOG electrodes to sample small populations of highly-selective neurons, while the  
7 BOLD fMRI response spatially sums over larger populations of neurons, mixing more and  
8 less selective signals. This same pattern has been observed in other studies comparing fMRI  
9 with ECOG. For instance, in a study of the fusiform face area, the BOLD signal evoked by  
10 faces was approximately double that evoked by non-face objects while the broadband high-  
11 gamma amplitude was triple or more for the same contrast (Parvizi et al 2012).

12  
13  
14  
15

1 **Acknowledgments**

2

3 We thank Johannes Rennig for assistance with fMRI data collection and Ping Sun, Daniel

4 Yoshor and Bill Bosking for assistance with ECOG. Funding was provided by Veterans

5 Administration Clinical Science Research and Development Merit Award Number

6 1I01CX000325-01A1 and NIH R01NS065395.

1 **Figure Legends**

2 **Figure 1. Converging evidence from fMRI and ECOG for a functional boundary in**  
3 **posterior STG.**

4 A. Cortical surface models of five hemispheres from five ECOG participants (case letter  
5 codes indicate anonymized participant IDs). Colored circles show locations of subdural  
6 electrodes on the STG showing a significant response to audiovisual speech. Warm  
7 electrode colors indicate greater response to audiovisual speech with a clear auditory  
8 component. Cool electrode colors indicate greater response to speech with a noisy auditory  
9 component. Dashed black line shows the location of the anatomical border between anterior  
10 STG and posterior STG defined by the Desikan-Killiany atlas (Desikan et al 2006).  
11 B. The preference of each electrode for clear or noisy speech (y-axis) plotted against its  
12 location relative to the anterior-posterior STG border (x-axis) with one symbol per  
13 electrode. Negative values on the x-axis are more anterior, positive values are more  
14 posterior.  
15 C. Cortical surface models of twelve hemispheres from six fMRI participants. Surface  
16 nodes on the STG are colored by their preference for clear or noisy audiovisual speech  
17 (same color scale for A and C).

18

19 **Figure 2. fMRI responses along the length of the STG.**

20 For each fMRI participant, the STG was parcellated into 1 mm bins from the most anterior  
21 point (A) to the most posterior point (P). For all surface nodes in each bin, the average  
22 value of the clear vs. noisy *t*-statistic was averaged. In each plot, the y-axis is the average *t*-  
23 statistic and the x-axis is the location along the STG from A to P. The left column shows  
24 plots from the left hemispheres, the right column shows plots for the right hemispheres;

1 case letter codes indicate anonymized participant IDs. In each hemisphere, the location of  
2 the functional boundary between anterior STG and posterior STG was defined as the first  
3 zero-crossing of this curve in the posterior third of the STG (red vertical lines). In each  
4 hemisphere, the anatomical boundary between anterior and posterior STG was defined by  
5 the posterior margin of Heschl's gyrus (gray dashed vertical lines). For case OD right  
6 hemisphere, the two boundaries overlap.

7

8 **Figure 3. BOLD fMRI Responses to clear and noisy audiovisual speech in anterior**  
9 **and posterior STG.**

10 A. The average fMRI response for anterior STG was created by selecting all voxels in each  
11 hemisphere that were located from 0 mm to 30 mm anterior to the anatomical boundary  
12 defined by Heschl's gyrus and that showed a significant response to any stimulus.

13 Responses shown for audiovisual speech with a clear auditory component (blue) and a  
14 noisy auditory component (orange). Lines show mean, shaded regions show SEM across  
15 participants.

16 B. The average fMRI response for posterior STG was created by selecting all responsive  
17 voxels in each hemisphere that were located from 0 mm to 15 mm posterior to the  
18 anatomical boundary defined by Heschl's gyrus.

19 C. Average BOLD fMRI response in the anterior STG, defined as all responsive voxels  
20 located from 0 mm to 30 mm anterior to the functional boundaries defined as shown in  
21 Figure 2.

22 D. BOLD fMRI response in the posterior STG, defined as all responsive voxels located  
23 from 0 mm to 15 mm posterior to the functional boundary.

24



1 **Figure 4. Comparison of ECOG and BOLD fMRI responses.**

- 2 A. The broadband high-gamma power (70 - 110 Hz) in the ECOG response plotted as the  
3 increase relative to prestimulus baseline (-500 to -100 ms) for audiovisual speech with a  
4 clear auditory component (blue line) and a noisy auditory component (orange line). Grand  
5 mean across all anterior STG electrodes in all participants (shaded region shows SEM).  
6 B. Grand mean response to clear and noisy speech across all posterior STG electrodes.  
7 C. A model hemodynamic response function (HRF) used to create the shape of the  
8 predicted fMRI response by convolving with the ECOG response.  
9 D. Predicted fMRI responses for anterior STG (dotted lines) compared with the actual  
10 fMRI responses from Figure 3C (solid lines). The predicted response was created by  
11 convolution with the model HRF and fitting a scale factor to determine the amplitude. A  
12 separate scale factor was used for each condition.  
13 E. Predicted fMRI responses for posterior STG (dotted lines) compared against the actual  
14 fMRI responses from Figure 3D (solid lines).

15

16 **Figure 5. STG responses to unisensory auditory and visual speech.**

- 17 A. The response of anterior STG to unisensory auditory and visual speech in the fMRI  
18 localizer experiment.  
19 B. The response of posterior STG to unisensory auditory and visual speech in the fMRI  
20 localizer experiment.

21

1

2

3 **Table 1:** Linear Mixed-Effects Model of the Response Amplitude in STG Regions Defined

4 by Anatomical Boundary

| <b>Fixed Effects</b>           | Estimate     | Std. Error  | DF        | t-value     | p-value                     |
|--------------------------------|--------------|-------------|-----------|-------------|-----------------------------|
| Baseline                       | 0.40         | 0.03        | 35.9      | 15.4        | $< 10^{-16}$                |
| <b>Auditory Noise (An)</b>     | <b>-0.14</b> | <b>0.03</b> | <b>84</b> | <b>-5.4</b> | <b><math>10^{-6}</math></b> |
| <b>Posterior Location x An</b> | <b>0.16</b>  | <b>0.04</b> | <b>84</b> | <b>4.2</b>  | <b><math>10^{-4}</math></b> |
| <b>Posterior Location</b>      | <b>-0.07</b> | <b>0.03</b> | <b>84</b> | <b>-2.6</b> | <b>0.01</b>                 |
| Visual Noise (Vn)              | -0.03        | 0.03        | 84        | -1.0        | 0.31                        |
| Posterior Location x Vn        | -0.02        | 0.04        | 84        | -0.6        | 0.52                        |
| Posterior Location x An x Vn   | 0.01         | 0.05        | 84        | 0.2         | 0.83                        |
| An x Vn                        | 0.00         | 0.04        | 84        | 0.0         | 0.97                        |

5

6 **Table 1:** Results of an LME model of the response amplitude in STG regions defined by an

7 anatomical boundary. The fixed effects were the location of each region (Anterior vs.

8 Posterior), the presence or absence of auditory noise (An) in the stimulus and the presence

9 or absence of visual noise (Vn) in the stimulus. STG ROIs from right and left hemisphere

10 across 6 subjects were included in the model as random factor. For each effect, the model

11 estimate (in units of % signal change) for that factor is shown relative to baseline, the

12 response in anterior STG ROI to clear audiovisual. The “Std. Error” column shows the

13 standard error of the estimate. The degrees of freedom (“DF”), t-value and p-value derived

14 from the model were calculated according to the Satterthwaite approximation, as provided

1 by the *lmerTest* package (Kuznetsova et al 2015). The baseline is shown first, all other  
2 effects are ranked by absolute t-value. Significant effects are shown in bold.

3

4 **Table 2:** Linear Mixed-Effects Model of the Response Amplitude in STG Regions Defined  
5 by Functional Boundary

| <b>Fixed Effects:</b>          | Estimate     | Std. Error  | DF        | t-value     | p-value                     |
|--------------------------------|--------------|-------------|-----------|-------------|-----------------------------|
| Baseline                       | 0.37         | 0.03        | 38.32     | 10.8        | $10^{-13}$                  |
| <b>Posterior Location x An</b> | <b>0.21</b>  | <b>0.05</b> | <b>84</b> | <b>4.1</b>  | <b><math>10^{-4}</math></b> |
| <b>Auditory Noise (An)</b>     | <b>-0.14</b> | <b>0.04</b> | <b>84</b> | <b>-3.8</b> | <b><math>10^{-4}</math></b> |
| Posterior Location             | -0.04        | 0.04        | 84        | -1.1        | 0.28                        |
| Visual Noise (Vn)              | -0.02        | 0.04        | 84        | -0.7        | 0.49                        |
| Posterior Location x Vn        | -0.02        | 0.05        | 84        | -0.4        | 0.66                        |
| Posterior Location x An x Vn   | 0.03         | 0.07        | 84        | 0.4         | 0.69                        |
| An x Vn                        | -0.01        | 0.05        | 84        | -0.1        | 0.92                        |

6

7 **Table 2:** Results of an LME model of the response amplitude in STG regions defined by  
8 the functionally-defined boundary between anterior and posterior STG.

9

10

- 1 **Table 3:** Linear Mixed-Effects Model of the Response Amplitude in Anterior and Posterior  
2 ECOG electrodes.

| Fixed effects:                 | Estimate      | Std. Error  | DF          | t-value     | p-value                      |
|--------------------------------|---------------|-------------|-------------|-------------|------------------------------|
| <b>Baseline</b>                | 183.1         | 24.8        | 33.7        | 7.4         | $10^{-8}$                    |
| <b>Auditory noise (An)</b>     | <b>-109.6</b> | <b>13.5</b> | <b>188</b>  | <b>-8.1</b> | <b><math>10^{-13}</math></b> |
| <b>Posterior location x An</b> | <b>140.6</b>  | <b>21.2</b> | <b>188</b>  | <b>6.6</b>  | <b><math>10^{-10}</math></b> |
| <b>Posterior location</b>      | <b>-101</b>   | <b>38.7</b> | <b>34.2</b> | <b>-2.6</b> | <b>0.01</b>                  |
| Visual noise (Vn)              | 21.6          | 13.5        | 188         | 1.6         | 0.11                         |
| An x Vn                        | -13.3         | 19.1        | 188         | -0.7        | 0.49                         |
| Posterior location x Vn        | -8.9          | 21.2        | 188         | -0.4        | 0.67                         |
| Posterior location x An x Vn   | 3.6           | 29.9        | 188         | 0.1         | 0.91                         |

- 3  
4 **Table 3:** Results of an LME model of the ECOG response amplitude. The fixed effects  
5 were the location of each electrode (Anterior vs. Posterior), the presence or absence of  
6 auditory noise (An) in the stimulus and the presence or absence of visual noise (Vn) in the  
7 stimulus.  
8

## 1   **References**

- 2   Beauchamp MS, Lee KE, Argall BD, Martin A. 2004. Integration of auditory and visual  
3       information about objects in superior temporal sulcus. *Neuron* 41: 809-23
- 4   Beauchamp MS, Nath AR, Pasalar S. 2010. fMRI-Guided transcranial magnetic stimulation  
5       reveals that the superior temporal sulcus is a cortical locus of the McGurk effect. *J*  
6       *Neurosci* 30: 2414-7
- 7   Beck JM, Ma WJ, Kiani R, Hanks T, Churchland AK, et al. 2008. Probabilistic population  
8       codes for Bayesian decision making. *Neuron* 60: 1142-52
- 9   Belin P, Zatorre RJ, Lafaille P, Ahad P, Pike B. 2000. Voice-selective areas in human  
10      auditory cortex. *Nature* 403: 309-12
- 11   Bernstein LE, Auer ET, Takayanagi S. 2004. Auditory speech detection in noise enhanced  
12      by lipreading. *Speech Communication* 44: 5-18
- 13   Bernstein LE, Jiang J, Pantazis D, Lu ZL, Joshi A. 2011. Visual phonetic processing localized  
14      using speech and nonspeech face gestures in video and point-light displays. *Human*  
15      *Brain Mapping* 32: 1660-76
- 16   Bishop CW, Miller LM. 2009. A multisensory cortical network for understanding speech in  
17      noise. *Journal of cognitive neuroscience* 21: 1790-805
- 18   Callan DE, Jones JA, Munhall K, Callan AM, Kroos C, Vatikiotis-Bateson E. 2003. Neural  
19      processes underlying perceptual enhancement by visual speech gestures.  
20      *Neuroreport* 14: 2213-8
- 21   Calvert GA, Campbell R, Brammer MJ. 2000. Evidence from functional magnetic resonance  
22      imaging of crossmodal binding in the human heteromodal cortex. *Current biology :*  
23      *CB* 10: 649-57
- 24   Chang EF, Rieger JW, Johnson K, Berger MS, Barbaro NM, Knight RT. 2010. Categorical  
25      speech representation in human superior temporal gyrus. *Nature neuroscience* 13:  
26      1428-32
- 27   Cheng K, Waggoner RA, Tanaka K. 2001. Human ocular dominance columns as revealed by  
28      high-field functional magnetic resonance imaging. *Neuron* 32: 359-74
- 29   Cox RW. 1996. AFNI: Software for analysis and visualization of functional magnetic  
30      resonance neuroimages. *Comput Biomed Res* 29: 162-73
- 31   Crosse MJ, Di Liberto GM, Lalor EC. 2016. Eye Can Hear Clearly Now: Inverse Effectiveness  
32      in Natural Audiovisual Speech Processing Relies on Long-Term Crossmodal  
33      Temporal Integration. *J Neurosci* 36: 9888-95
- 34   Dale AM, Greve DN, Burock MA. *5th International Conference on Functional Mapping of*  
35      *the Human Brain, Duesseldorf, Germany, 1999, 9.*
- 36   Desikan RS, Segonne F, Fischl B, Quinn BT, Dickerson BC, et al. 2006. An automated  
37      labeling system for subdividing the human cerebral cortex on MRI scans into gyral  
38      based regions of interest. *Neuroimage* 31: 968-80
- 39   Destrieux C, Fischl B, Dale A, Halgren E. 2010. Automatic parcellation of human cortical  
40      gyri and sulci using standard anatomical nomenclature. *NeuroImage* 53: 1-15
- 41   Fischl B, Liu, A., Dale, A.M., 2001. Automated manifold surgery: constructing, the gaatcmo,  
42      human cerebral cortex. *IEEE TMI* 20 (1). 2001. Automated manifold surgery:  
43      constructing

- 1 geometrically accurate and topologically correct models of the  
2 human cerebral cortex. *IEEE TMI* 20 (1), 70–80. *IEEE Transactions in Medical Imaging* 20:  
3 70-80
- 4 Foxe JJ, Wylie GR, Martinez A, Schroeder CE, Javitt DC, et al. 2002. Auditory-  
5 somatosensory multisensory processing in auditory association cortex: an fMRI  
6 study. *Journal of neurophysiology* 88: 540-3
- 7 Grill-Spector K, Malach R. 2004. The human visual cortex. *Annu Rev Neurosci* 27: 649-77
- 8 Hermes D, Nguyen M, Winawer J. 2017. Neuronal synchrony and the relation between the  
9 blood-oxygen-level dependent response and the local field potential. *PLoS Biol* 15:  
10 e2001461
- 11 Holmes CJ, Hoge R, Collins L, Woods R, Toga AW, Evans AC. 1998. Enhancement of MR  
12 images using registration for signal averaging. *J Comput Assist Tomogr* 22: 324-33
- 13 Janszky J, Jokeit H, Heinemann D, Schulz R, Woermann FG, Ebner A. 2003. Epileptic activity  
14 influences the speech organization in medial temporal lobe epilepsy. *Brain* 126:  
15 2043-51
- 16 Kramer MA, Cash SS. 2012. Epilepsy as a disorder of cortical network organization.  
17 *Neuroscientist* 18: 360-72
- 18 Kuznetsova A, Brockhoff PB, Christensen RHB. 2015. Package ‘lmerTest’. *R package*  
19 *version: 2.0-29*
- 20 Leaver AM, Rauschecker JP. 2016. Functional Topography of Human Auditory Cortex. *J*  
21 *Neurosci* 36: 1416-28
- 22 Lee H, Noppeney U. 2011. Physical and perceptual factors shape the neural mechanisms  
23 that integrate audiovisual signals in speech comprehension. *The Journal of*  
24 *neuroscience : the official journal of the Society for Neuroscience* 31: 11338-50
- 25 Lindquist MA, Meng Loh J, Atlas LY, Wager TD. 2009. Modeling the hemodynamic  
26 response function in fMRI: efficiency, bias and mis-modeling. *Neuroimage* 45:  
27 S187-98
- 28 Magnotti JF, Beauchamp MS. 2017. A Causal Inference Model Explains Perception of the  
29 McGurk Effect and Other Incongruent Audiovisual Speech. *PLoS Comput Biol* 13:  
30 e1005229
- 31 McGettigan C, Faulkner A, Altarelli I, Obleser J, Baverstock H, Scott SK. 2012. Speech  
32 comprehension aided by multiple modalities: behavioural and neural interactions.  
33 *Neuropsychologia* 50: 762-76
- 34 Mesgarani N, Cheung C, Johnson K, Chang EF. 2014. Phonetic feature encoding in human  
35 superior temporal gyrus. *Science* 343: 1006-10
- 36 Miller LM, D'Esposito M. 2005. Perceptual fusion and stimulus coincidence in the cross-  
37 modal integration of speech. *The Journal of neuroscience : the official journal of the*  
38 *Society for Neuroscience* 25: 5884-93
- 39 Moerel M, De Martino F, Formisano E. 2014. An anatomical and functional topography of  
40 human auditory cortical areas. *Front Neurosci* 8: 225
- 41 Murphey DK, Yoshor D, Beauchamp MS. 2008. Perception matches selectivity in the  
42 human anterior color center. *Current biology : CB* 18: 216-20
- 43 Nath AR, Beauchamp MS. 2012. A neural basis for interindividual differences in the  
44 McGurk effect, a multisensory speech illusion. *NeuroImage* 59: 781-7

- 1 Nath AR, Fava EE, Beauchamp MS. 2011. Neural correlates of interindividual differences in  
2 children's audiovisual speech perception. *J Neurosci* 31: 13963-71
- 3 Ojemann GA, Ojemann J, Ramsey NF. 2013. Relation between functional magnetic  
4 resonance imaging (fMRI) and single neuron, local field potential (LFP) and  
5 electrocorticography (ECoG) activity in human cortex. *Front Hum Neurosci* 7: 34
- 6 Ozker M, Schepers IM, Magnotti JF, Yoshor D, Beauchamp MS. 2017. A Double  
7 Dissociation between Anterior and Posterior Superior Temporal Gyrus for  
8 Processing Audiovisual Speech Demonstrated by Electrocorticography. *J Cogn  
9 Neurosci* 29: 1044-60
- 10 Parvizi J, Jacques C, Foster BL, Witthoft N, Rangarajan V, et al. 2012. Electrical stimulation  
11 of human fusiform face-selective regions distorts face perception. *J Neurosci* 32:  
12 14915-20
- 13 Rangarajan V, Parvizi J. 2015. Functional asymmetry between the left and right human  
14 fusiform gyrus explored through electrical brain stimulation. *Neuropsychologia*
- 15 Ray S, Maunsell JH. 2011. Different origins of gamma rhythm and high-gamma activity in  
16 macaque visual cortex. *PLoS biology* 9: e1000610
- 17 Reale RA, Calvert GA, Thesen T, Jenison RL, Kawasaki H, et al. 2007. Auditory-visual  
18 processing represented in the human superior temporal gyrus. *Neuroscience* 145:  
19 162-84
- 20 Ross LA, Saint-Amour D, Leavitt VM, Javitt DC, Foxe JJ. 2007. Do you see what I am saying?  
21 Exploring visual enhancement of speech comprehension in noisy environments.  
22 *Cerebral cortex (New York, N.Y. : 1991)* 17: 1147-53
- 23 Salmelin R. 2007. Clinical neurophysiology of language: the MEG approach. *Clin  
24 Neurophysiol* 118: 237-54
- 25 Sekiyama K, Kanno I, Miura S, Sugita Y. 2003. Auditory-visual speech perception examined  
26 by fMRI and PET. *Neuroscience research* 47: 277-87
- 27 Shahin AJ, Kerlin JR, Bhat J, Miller LM. 2012. Neural restoration of degraded audiovisual  
28 speech. *Neuroimage* 60: 530-8
- 29 Sohoglu E, Davis MH. 2016. Perceptual learning of degraded speech by minimizing  
30 prediction error. *Proc Natl Acad Sci U S A* 113: E1747-56
- 31 Stevenson RA, James TW. 2009. Audiovisual integration in human superior temporal  
32 sulcus: Inverse effectiveness and the neural processing of speech and object  
33 recognition. *Neuroimage* 44: 1210-23
- 34 Sumbly WH, Pollack I. 1954. Visual contribution to speech intelligibility in noise. *The journal  
35 of the acoustical society of america* 26: 212-15
- 36 Tang C, Hamilton LS, Chang EF. 2017. Intonational speech prosody encoding in the human  
37 auditory cortex. *Science* 357: 797-801
- 38 Tyler LK, Bright P, Dick E, Tavares P, Pilgrim L, et al. 2003. Do semantic categories activate  
39 distinct cortical regions? Evidence for a distributed neural semantic system. *Cogn  
40 Neuropsychol* 20: 541-59
- 41 van Atteveldt N, Formisano E, Goebel R, Blomert L. 2004. Integration of letters and speech  
42 sounds in the human brain. *Neuron* 43: 271-82

- 1 Weiner KS, Grill-Spector K. 2011. Not one extrastriate body area: using anatomical  
2 landmarks, hMT+, and visual field maps to parcellate limb-selective activations in  
3 human lateral occipitotemporal cortex. *Neuroimage* 56: 2183-99
- 4 Witthoft N, Nguyen ML, Golarai G, LaRocque KF, Liberman A, et al. 2014. Where is human  
5 V4? Predicting the location of hV4 and VO1 from cortical folding. *Cereb Cortex* 24:  
6 2401-8
- 7 Zhu LL, Beauchamp MS. 2017. Mouth and Voice: A Relationship between Visual and  
8 Auditory Preference in the Human Superior Temporal Sulcus. *J Neurosci* 37: 2697-  
9 708
- 10



## A. ECOG

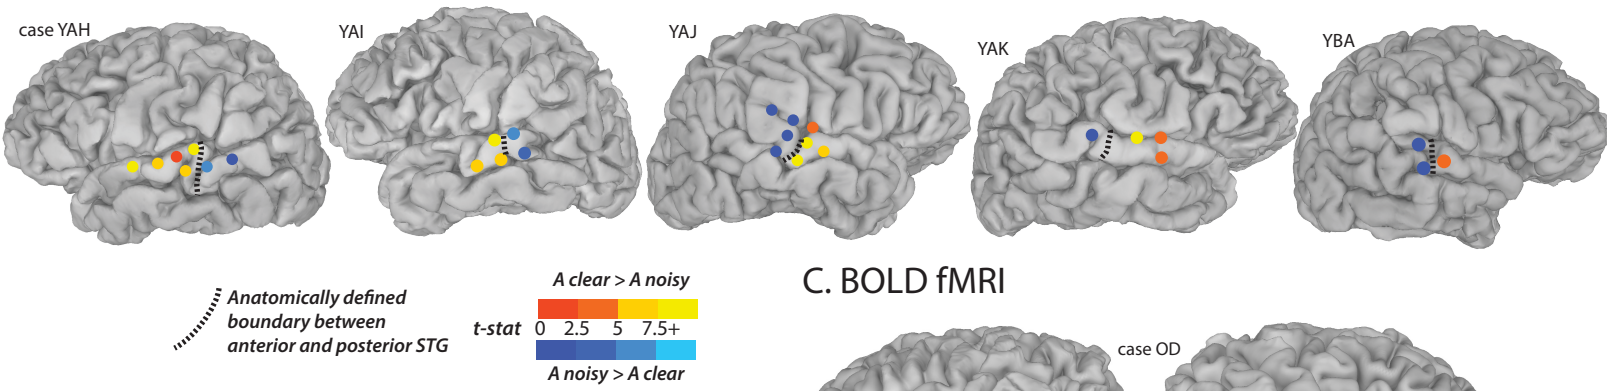

## B. ECOG

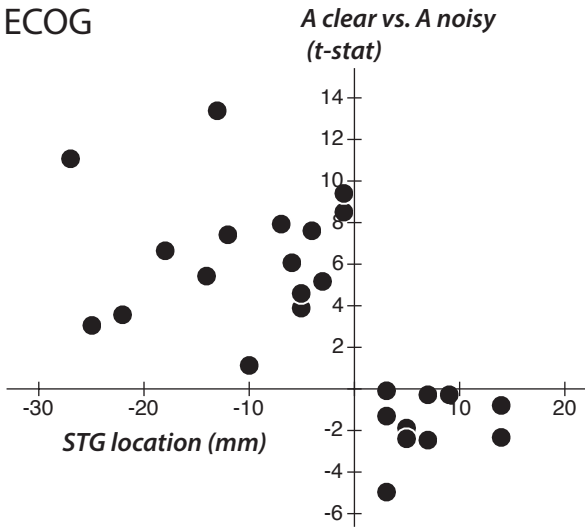

## C. BOLD fMRI

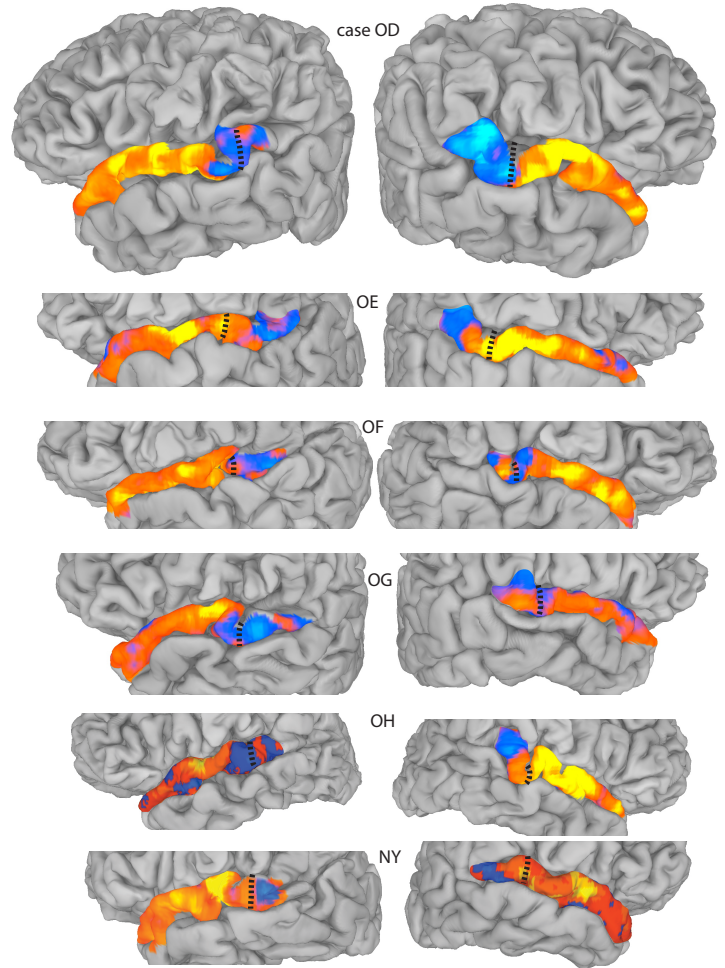

Figure 1

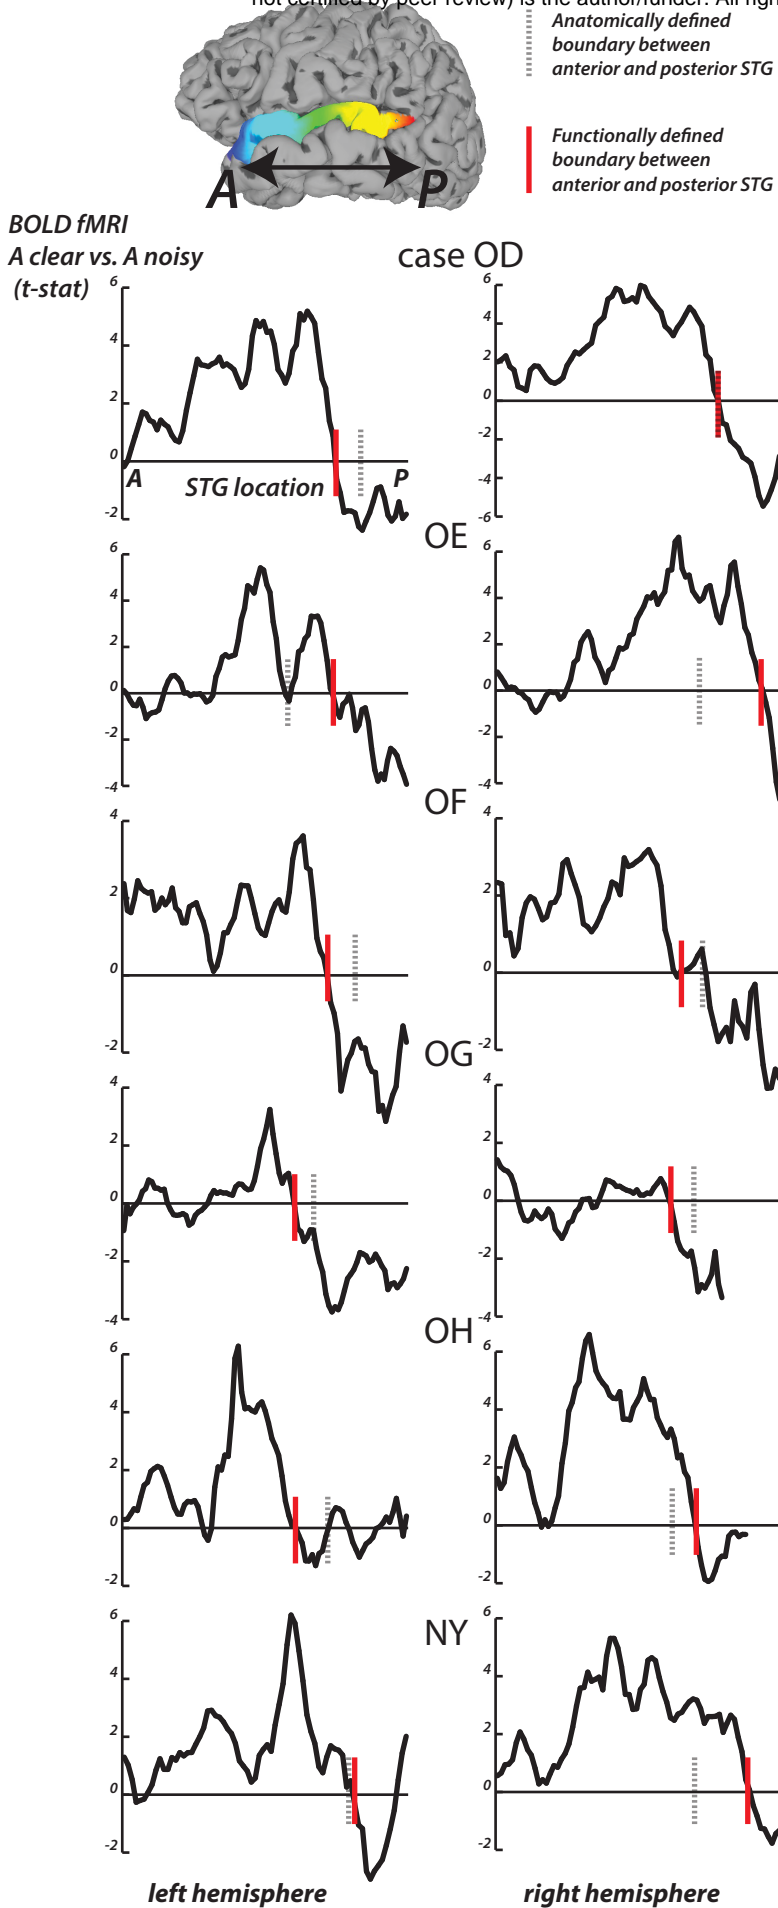

Figure 2

### A. Anterior STG (anatomical boundary)

% change from baseline  
(MR intensity)

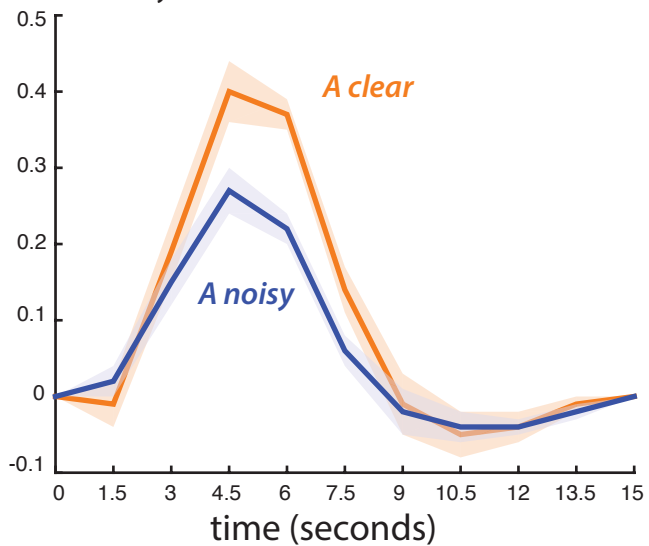

### B. Posterior STG (anatomical boundary)

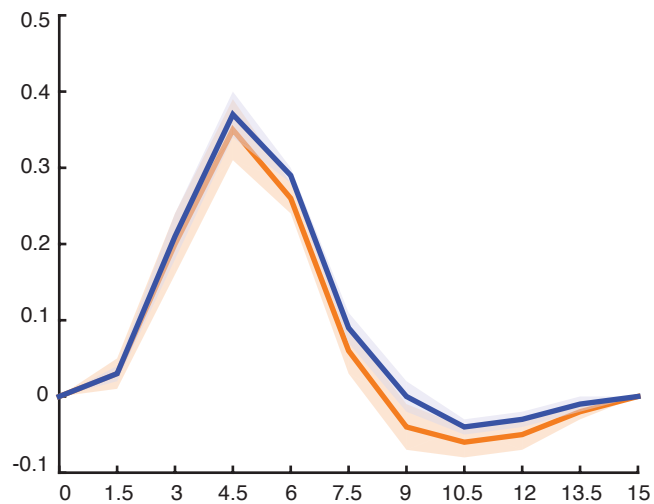

### C. Anterior STG (functional boundary)

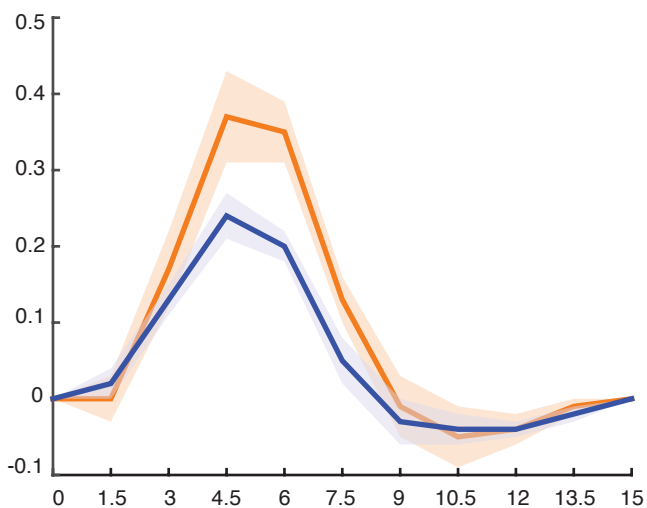

### D. Posterior STG (functional boundary)

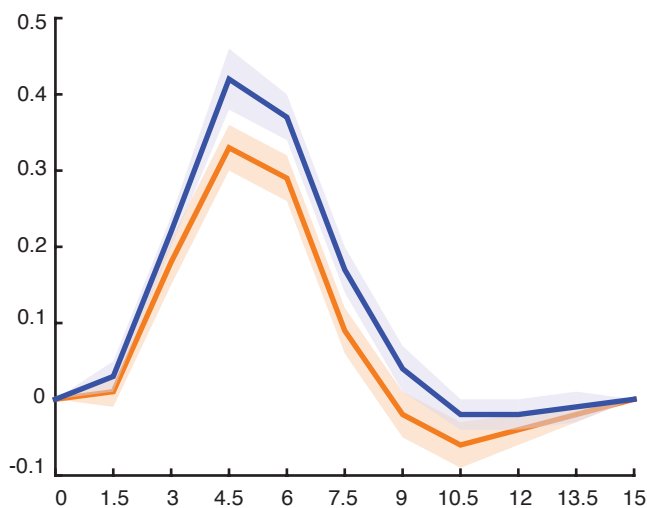

Figure 3

### A. Anterior STG (ECOG)

% change from baseline  
(broadband high gamma power)

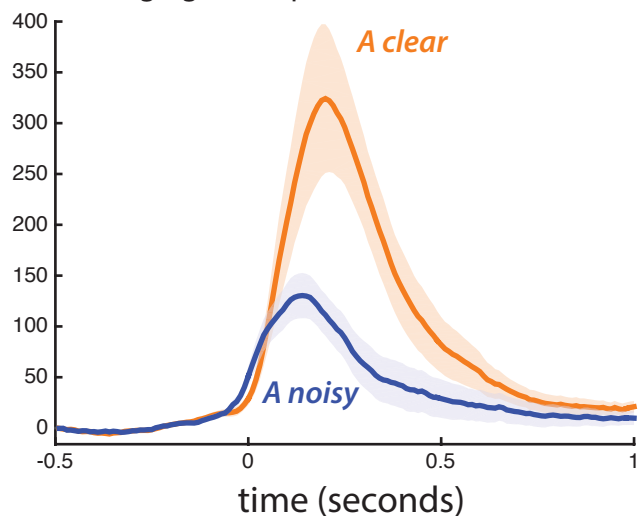

### B. Posterior STG (ECOG)

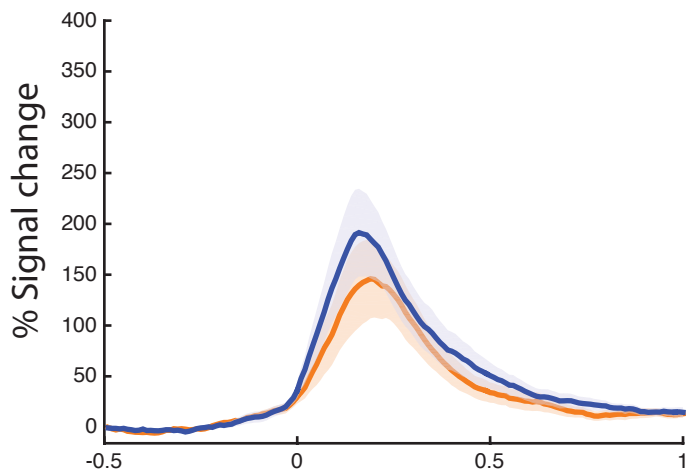

### C. model HRF

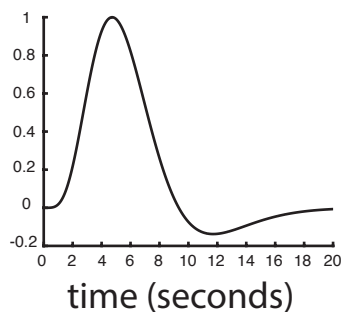

### D. Anterior STG (fMRI-actual and ECOG-predicted)

### E. Posterior STG (fMRI-actual and ECOG-predicted)

% change from baseline  
(MR intensity)

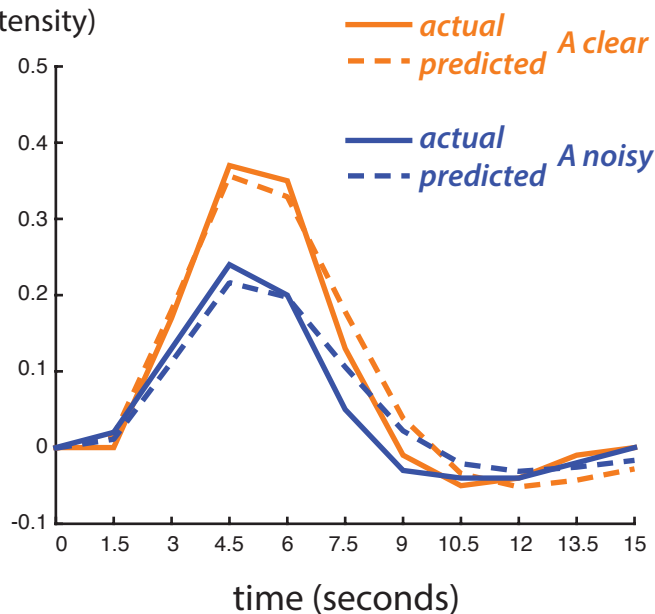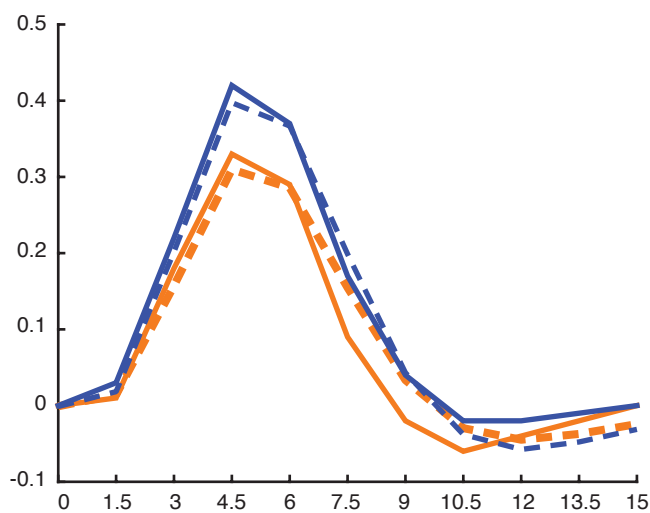

Figure 4

### A. Anterior STG

### B. Posterior STG

% change from baseline  
(MR intensity)

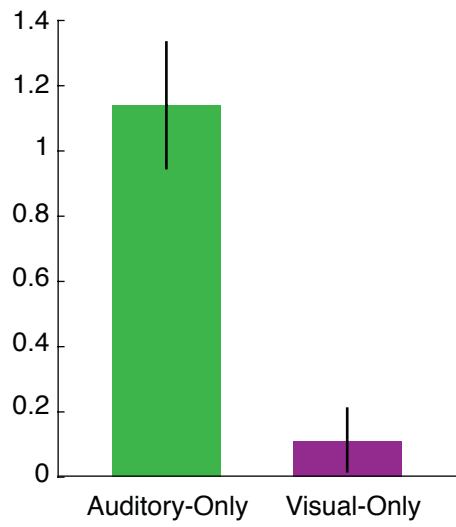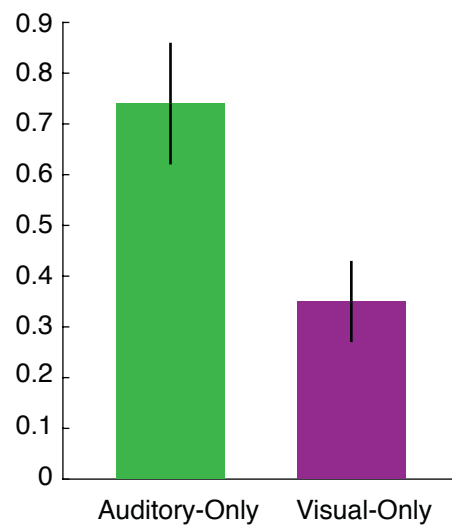

Figure 5
